# Supplementary material for: Effect of Food Preparations on In Vitro Bioactivities and Chemical Components of Fucus vesiculosus
Source: PubMed Central journal article supplement (PMC7404634; doi:10.3390/foods9070955), 2020-07-18
Supplement: foods-09-00955-s001.pdf [file foods-09-00955-s001.pdf]

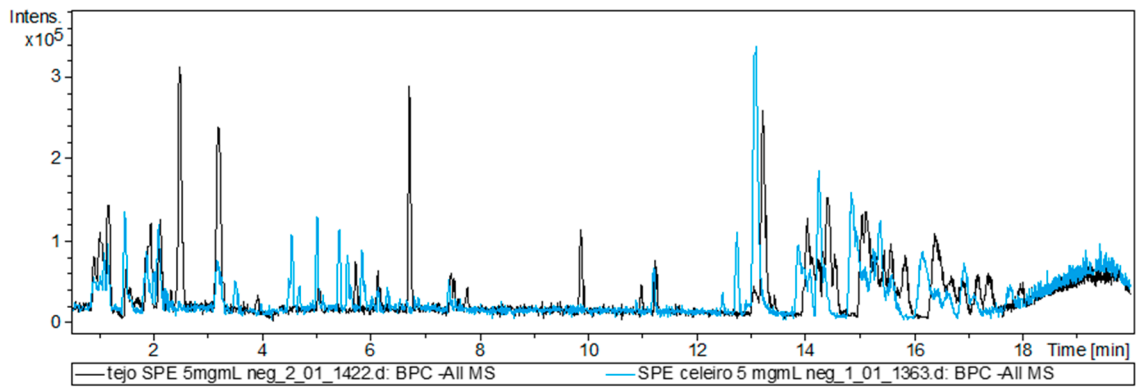

**Figure S1.** Chromatogram LC-HRMS/MS in negative mode of *F. vesiculosus* from ocean (blue) and from Tagus (black).
